# Supplementary material for: Achieving high ionic conductivity of LATP solid electrolyte via a LiTFSI-assisted cold sintering process
Source: Royal Society of Chemistry journal article supplement (doi:10.1039/d4ta06731b), 2024-01-01
Supplement: d4ta06731b1.pdf [file d4ta06731b1.pdf]

## Supporting Information

Achieving high ionic conductivity of LATP solid electrolyte via LiTFSI-assisted cold sintering process

Shanshan Yi,<sup>a,†</sup> Shuyu Zhou,<sup>a,b,†</sup> Yudong Liu,<sup>a</sup> PengPeng Dai,<sup>a</sup> Yuxin Liu,<sup>a</sup> Shixi Zhao<sup>\*a</sup> and Guozhong Cao<sup>\*c</sup>

---

<sup>a</sup> Shenzhen International Graduate School, Tsinghua University, Shenzhen, 518055, China.

<sup>b</sup> School of Materials Science and Engineering, Tsinghua University, Beijing, 100084, China.

<sup>c</sup> Department of Materials Science and Engineering, University of Washington, Seattle, WA 98195 (USA).

† Shanshan Yi and Shuyu Zhou contributed equally to this work.

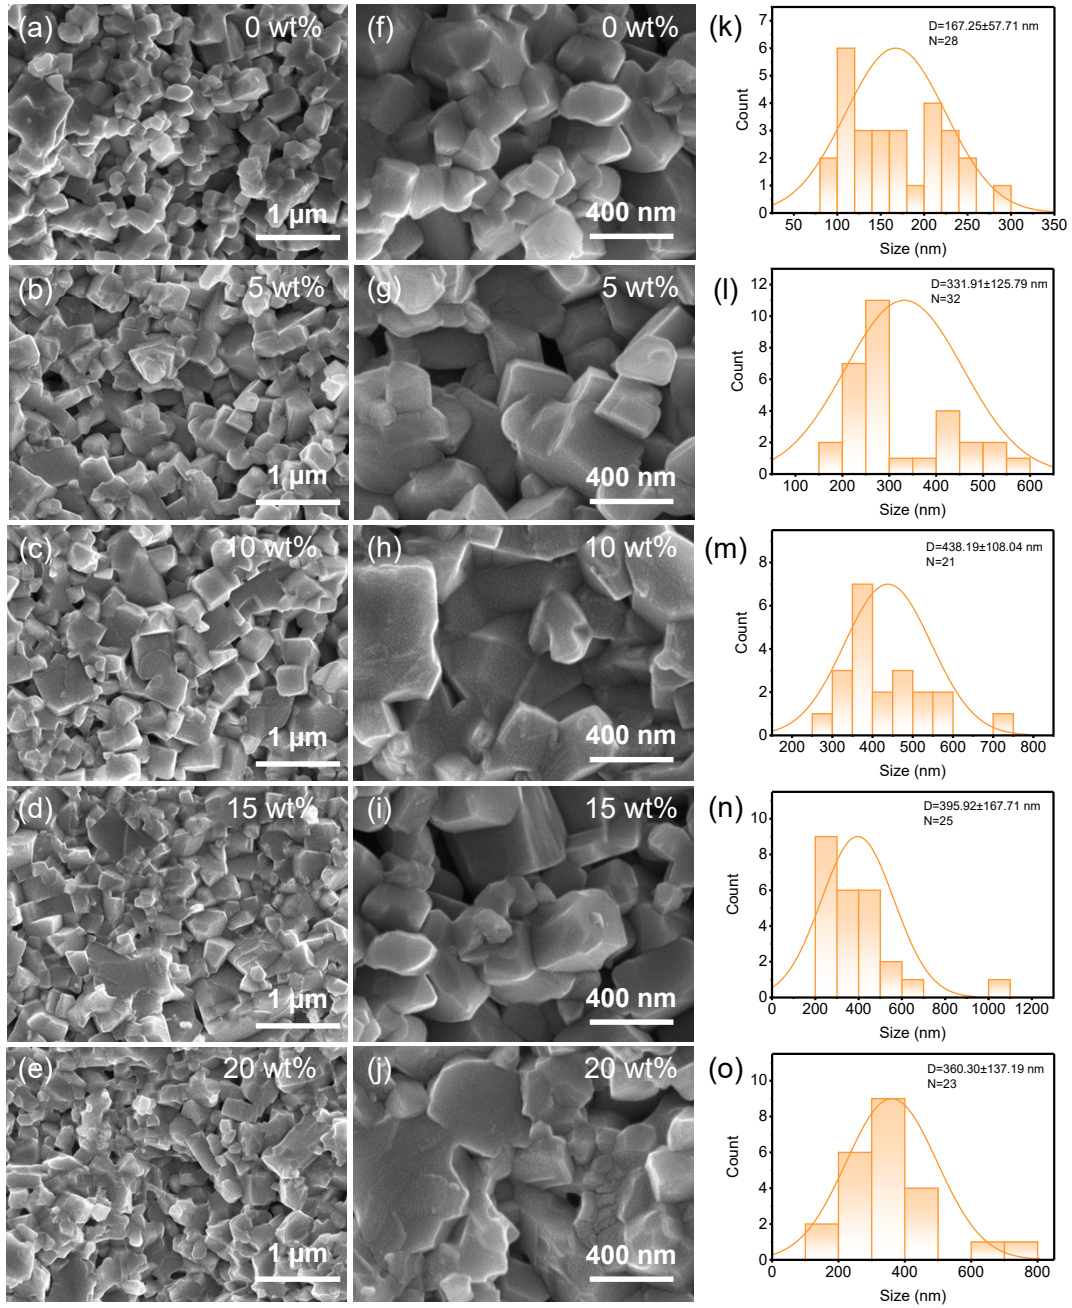

**Fig. S1.** SEM image and grain size distribution of CSH-LATP-xLiTFSI(650). (a,f,k): x=0; (b,g,l): x=0.05; (c,h,m): x=0.1; (d,i,n): x=0.15; (e,j,o): x=0.2.

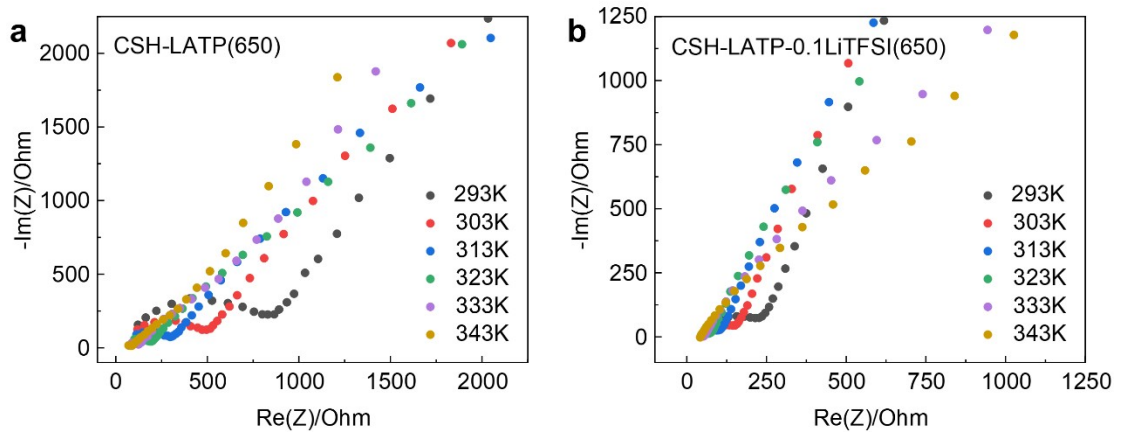

**Fig. S2** EIS results of (a) CSH-LATP(650) and (b) CSH-LATP-0.1LiTFSI(650) at different temperature.

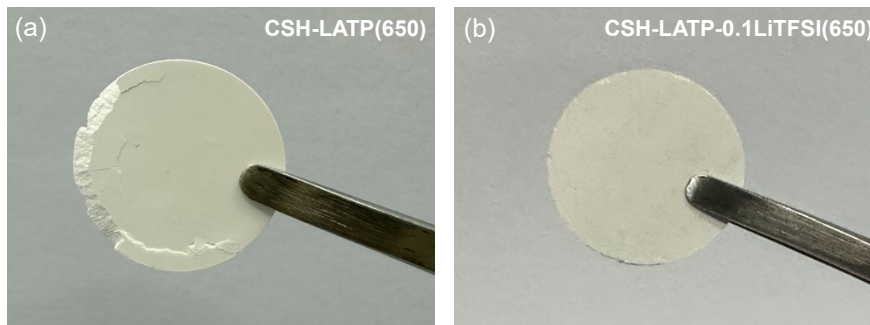

**Fig. S3** digital images of (a) CSH-LATP(650) and (b) CSH-LATP-0.1LiTFSI(650).

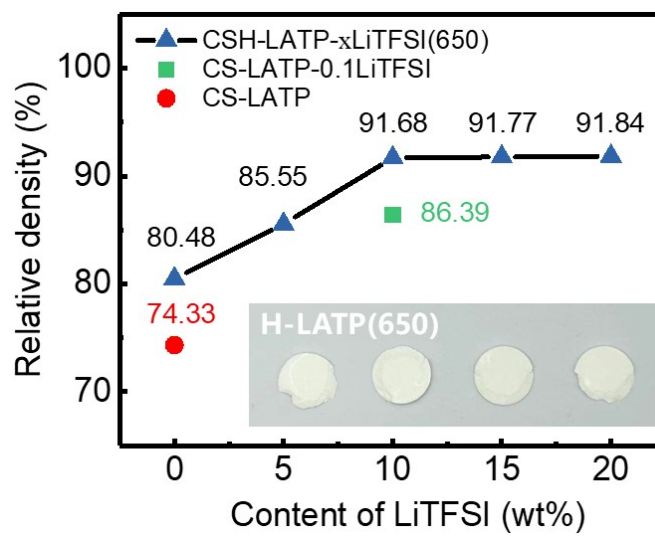

**Fig. S4** Relative density of LATP pellets at different experiment condition and the digital images of H-LATP(650) at bottom right.

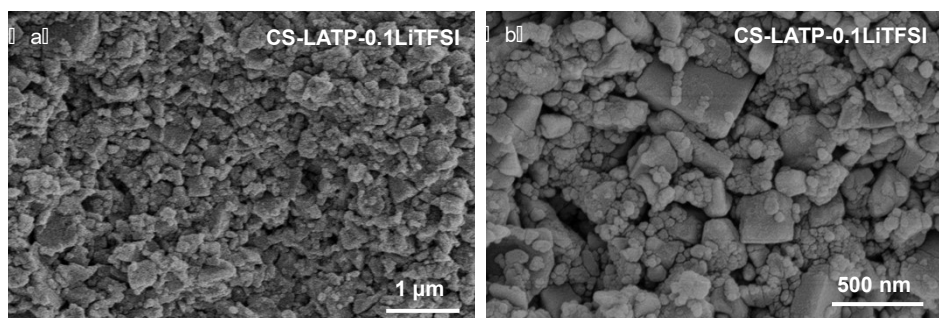

Figure S5 The SEM images of the cross section of CS-LATP-0.1LiTFSI.

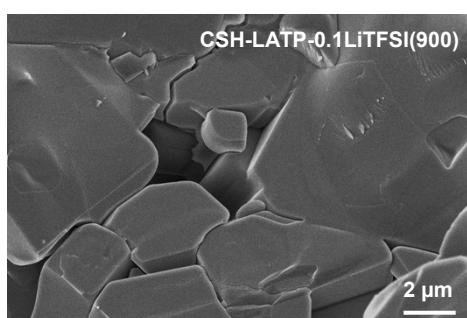

Fig. S6 The SEM images of the cross section of CSH-LATP-0.1LiTFSI(900).

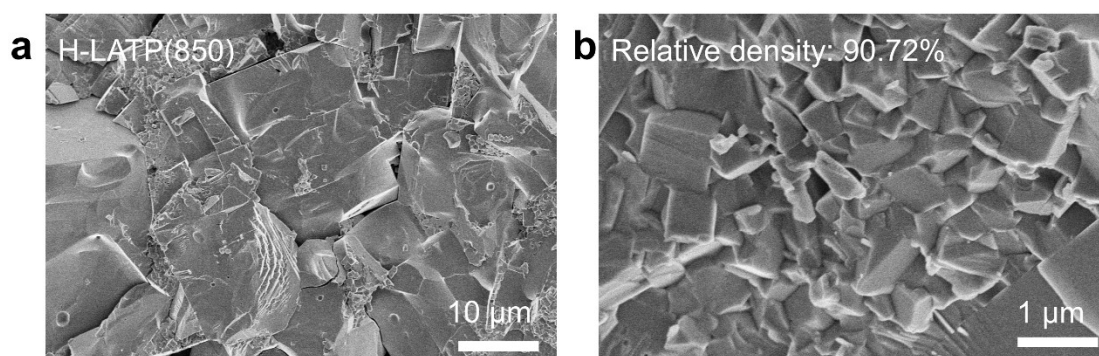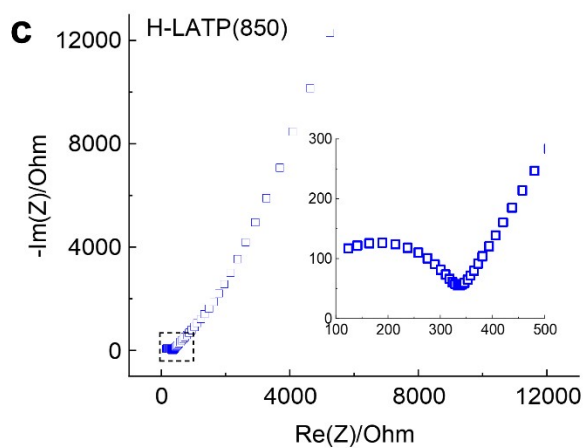

Fig. S7 (a,b) The SEM images of the cross section of H-LATP(850). (c) EIS results of H-LATP(850) at room temperature.

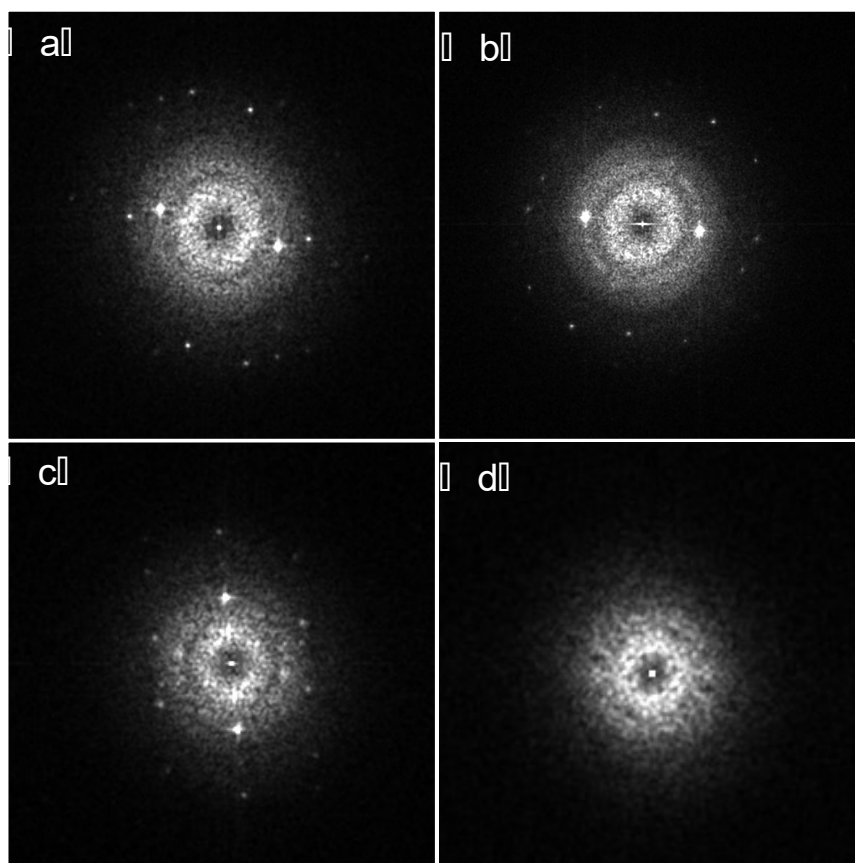

**Fig. S8** Electron diffraction pattern of (a) area A, (b) area B, (c) area C and (d) area D of Fig. 4a.

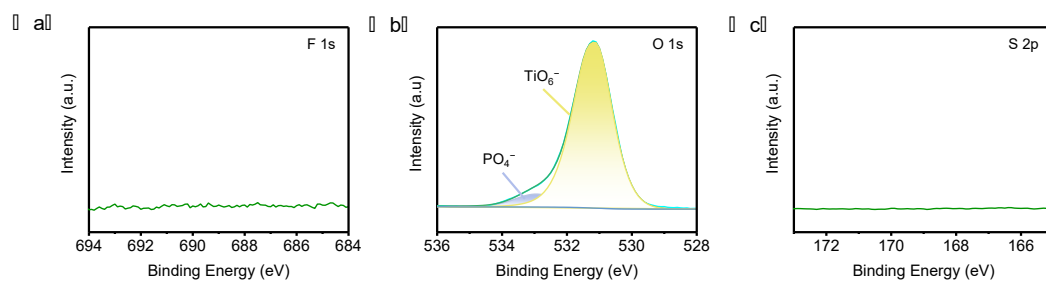

**Fig. S9** XPS spectra of CSH-LATP(650): (a) F 1s; (b) O 1s; (c) S 2p.

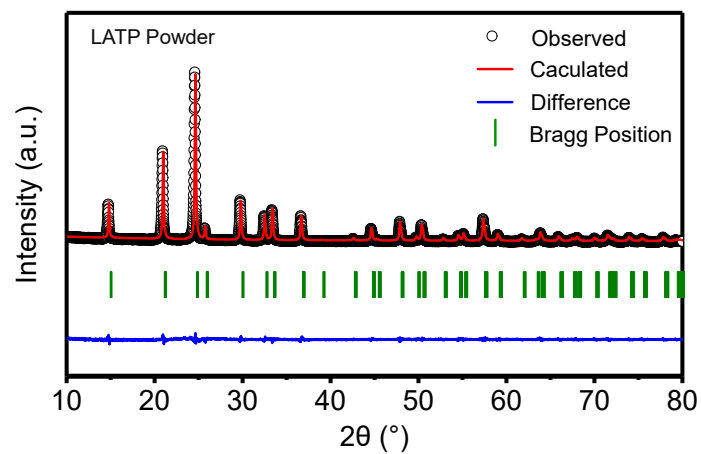

**Fig. S10** Rietveld refined XRD pattern of LATP powder.

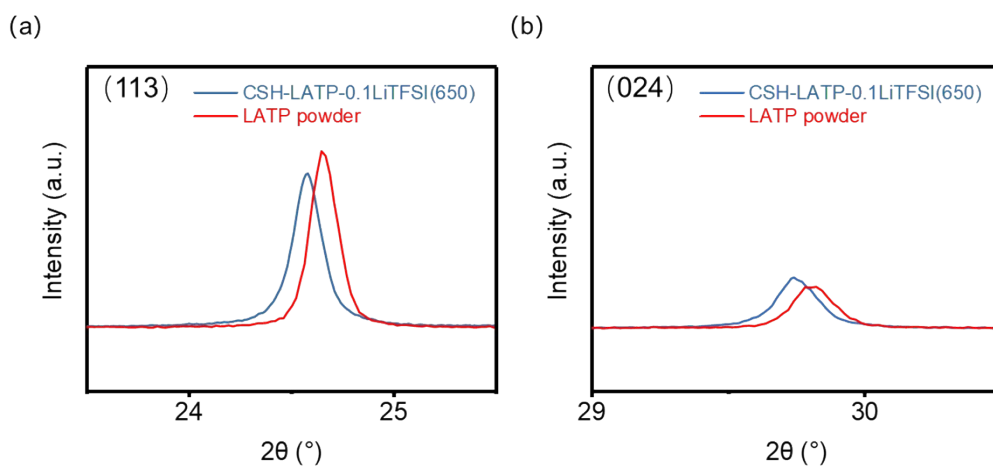

**Fig. S11** Enlarged views of (a) (113) and (b) (024) diffraction peaks.

**Table S1** The hardness test results of LATP pellets at different experiment condition

| Sample                  | Temperature of cold sintering | H-IT/GPa | HV    | E-IT/GPa |
|-------------------------|-------------------------------|----------|-------|----------|
| CSH-LATP(650)           | 130                           | 0.357    | 33.0  | 36.18    |
| CSH-LATP-0.1LiTFSI(650) | 130                           | 2.286    | 211.8 | 80.17    |
| CSH-LATP-0.1LiTFSI(650) | 200                           | 5.041    | 466.9 | 114.72   |
| H-LATP(900)             | /                             | 5.133    | 475.4 | 115.00   |

**Table S2** Rietveld fitting results of LATP and CSH-LATP-0.1LiTFSI(650) electrolyte samples.

| Sample             | space group | a=b (Å) | c (Å)    | $\alpha=\beta$ (°) | $\gamma$ (°) | V (Å <sup>3</sup> ) | R <sub>w</sub> |
|--------------------|-------------|---------|----------|--------------------|--------------|---------------------|----------------|
| LATP               | R-3C        | 8.49916 | 20.79765 | 90                 | 120          | 1301.059            | 7.64           |
| CSH-LATP-0.1LiTFSI | R-3C        | 8.49101 | 20.89296 | 90                 | 120          | 1304.517            | 11.7           |

**Table S3** Crystallographic data of LATP and CSH-LATP-0.1LiTFSI(650) electrolyte samples.

| Sample | Atom                    | Site | x       | y       | z       | Occupancy |
|--------|-------------------------|------|---------|---------|---------|-----------|
| LATP   | Li                      | 6b   | 0       | 0       | 0       | 1.1277    |
|        | Al                      | 12c  | 0       | 0       | 0.14128 | 0.15      |
|        | Ti                      | 12c  | 0       | 0       | 0.14128 | 0.8126    |
|        | P                       | 18e  | 0.28952 | 0       | 0.25    | 1         |
|        | O1                      | 36f  | 0.18539 | 0.98977 | 0.19037 | 1         |
|        | O2                      | 36f  | 0.18245 | 0.15861 | 0.08133 | 1         |
|        | CSH-LATP-0.1LiTFSI(650) | Li   | 6b      | 0       | 0       | 0         |
| Al     |                         | 12c  | 0       | 0       | 0.14131 | 0.15      |
| Ti     |                         | 12c  | 0       | 0       | 0.14131 | 0.8362    |
| P      |                         | 18e  | 0.28830 | 0       | 0.25    | 1         |
| O1     |                         | 36f  | 0.18231 | 0.99103 | 0.18898 | 1         |
| O2     |                         | 36f  | 0.18750 | 0.16430 | 0.08169 | 1         |

**Table S4** Comparison of the electrochemical performance using Li anode and LiFePO<sub>4</sub> cathode and relative density and ionic conductivity of CSH-LATP-0.1LiTFSI(650) with other reported works.

| Ref.                               | Ionic conductivity at RT (S cm <sup>-1</sup> ) | Sintering parameters | Initial discharge capacity (mAh g <sup>-1</sup> ) | Capacity decay rate per cycle |
|------------------------------------|------------------------------------------------|----------------------|---------------------------------------------------|-------------------------------|
| [1]                                | 8.73×10 <sup>-4</sup>                          | 900°C-6h             | 149.7                                             | 5.19% at 1C                   |
| [2]                                | 4.74×10 <sup>-4</sup>                          | 900°C-12h            | 157.6                                             | 4.92% at 0.1C                 |
| [3]                                | 1.15×10 <sup>-4</sup>                          | /                    | 154.7                                             | 5.75% at 0.2C                 |
| [4]                                | 6.46×10 <sup>-4</sup>                          | /                    | 139.72                                            | 7.24% at 0.5C                 |
| [5]                                | /                                              | 800°C-6h             | 130.1                                             | 4.8% at 0.5C                  |
| [6]                                | 1.06×10 <sup>-3</sup>                          | /                    | 164                                               | 6.83% at 0.2C                 |
| [7]                                | /                                              | 900°C-10h            | 166.3                                             | 10.32% at 0.4C                |
| [8]                                | 1.13×10 <sup>-4</sup>                          | 800°C-2h             | 119.4                                             | 9.5% at 0.5C                  |
| This work: CSH-LATP-0.1LiTFSI(650) | 7.85×10 <sup>-4</sup>                          | 650°C -2h            | 149.7                                             | 4.17% at 0.5C                 |

## References

- Huang, C.; Huang, S.; Wang, A.; Liu, Z.; Pei, D.; Hong, J.; Hou, S.; Vitos, L. and Jin, H. *J. Mater. Chem. A*, **2022**, *10*, 25500.
- Wang, Y.; Wang, L.; Shi, Q.; Zhong, C.; Gong, D.; Wang, X.; Zhan, C. and Liu, G. *J. Energy Chem.* **2023**, *80*, 89-98.
- Rong, Y.; Lu, Z.; Jin, C.; Xu, Y.; Peng, L.; Shi, R.; Gu, T.; Lu, C. and Yang, R. *ACS Sustainable Chem. Eng.* **2023**, *11*, 785-795.
- Kibret, D.; Mengesha, T.; Walle, K.; Wu, Y.; Chang, J.; Jose, R. and Yang, C. *J. Energy Storage* **2024**, *94*, 112523.
- Luo, L.; Zheng, F.; Gao, H.; Lan, C.; Sun, Z.; Huang, W.; Han, X.; Zhang, Z.; Su, P.; Wang, P.; Guo, S.; Lin, G.; Xu, J.; Wang, J.; Li, J.; Li, C.; Zhang, Q.; Wu, S.; Wang, M. and Chen, S. *Nano Res.* **2023**, *16(1)*: 1634-1641.
- Cho, Y.; Mong, A.; Hoang, H. and Kim, D. *J. Energy Storage* **2024**, *92*, 112295.
- Lei, M.; Fan, S.; Yu, Y.; Hu, J.; Chen, K.; Gu, Y.; Wu, C.; Zhang, Y. and Li, C. *Energy Storage Mater.* **2022**, *47*, 551-560.
- Tran, H.; Wu, Y.; Chien, W.; Wu, S.; Jose, R.; Lue, S. and Yang, C. *ACS Appl. Energy Mater.* **2020**, *3*, 11024-11035.
